# Supplementary material
Source: Springer Nature journal article supplement (https://www.springermedizin.de/resource/supplementary/12865_2009_261_MOESM1_ESM.pdf/9427626)

**A**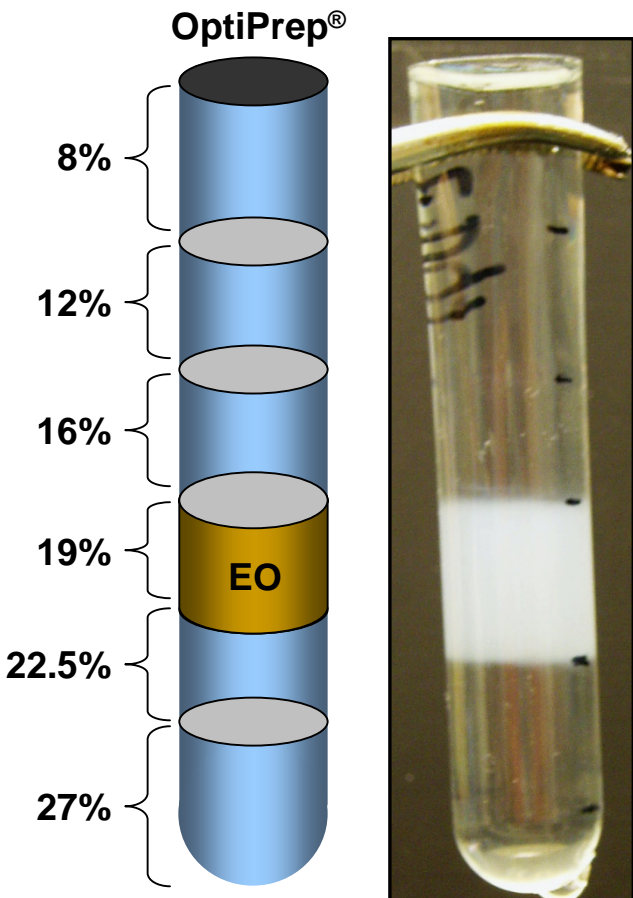**B**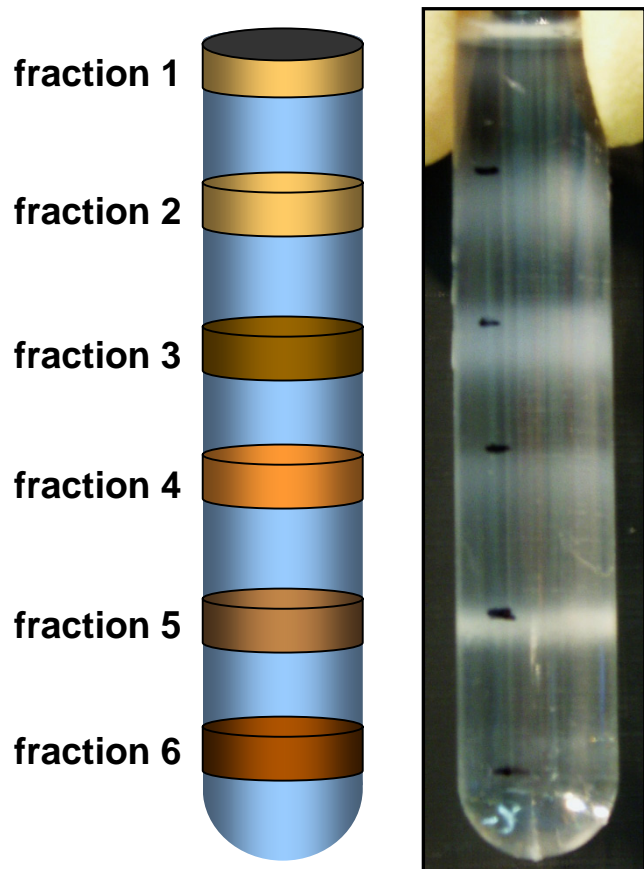

Supplement: MOESM1 [file 9427626]
